# Supplementary material for: Nitric oxide emission during the reductive heterogeneous photocatalysis of aqueous nitrate with TiO2
Source: Royal Society of Chemistry journal article supplement (doi:10.1039/c5ra17914a), 2015-01-01
Supplement: c5ra17914a1.pdf [file c5ra17914a1.pdf]

**Supplementary Information for**

**Nitric oxide emission during the reductive heterogeneous photocatalysis of aqueous nitrate  
with TiO<sub>2</sub>**

V. Nahuel Montesinos<sup>a,b,c</sup>, Natalia Quici<sup>a,b</sup>, Hugo Destailats<sup>d</sup>, Marta I. Litter\*<sup>a,b,e</sup>

<sup>a</sup> Gerencia Química, Comisión Nacional de Energía Atómica, Av. Gral. Paz 1499, 1650 San Martín,  
Prov. de Buenos Aires, Argentina

<sup>b</sup> Consejo Nacional de Investigaciones Científicas y Técnicas, Av. Rivadavia 1917, 1033 Ciudad  
Autónoma de Buenos Aires, Argentina

<sup>c</sup> Departamento de Química Inorgánica, Analítica y Química Física, FCEN, Universidad de Buenos  
Aires, Ciudad Universitaria Pabellón II, 1428 Ciudad Autónoma de Buenos Aires, Argentina

<sup>d</sup> Indoor Environment Department Group, Energy Technologies Area, Lawrence Berkeley National  
Laboratory, Berkeley, CA, USA

<sup>e</sup> Instituto de Investigación e Ingeniería Ambiental, Universidad Nacional de Gral. San Martín,  
Campus Miguelete, Av. 25 de Mayo y Martín de Irigoyen, 1650 San Martín, Prov. de Buenos Aires,  
Argentina

## Experimental section

### Chemicals

KNO<sub>3</sub> (> 99%, Mallinkrodt), concentrated HClO<sub>4</sub> (70%, Biopack) and HCOOH (88%, Biopack) were used without further purification. Analytical calibration standards of KNO<sub>3</sub>, NaNO<sub>2</sub> and NH<sub>4</sub>Cl were obtained from ChemLab and TiO<sub>2</sub> Aeroxide P25 was provided by Evonik. All experiments were done with MilliQ water (resistivity = 18 MΩ cm) and all mentioned chemicals were analytical grade or superior.

### Photocatalytic experiments

Photocatalytic removal of nitrate was carried out in a recirculating batch reactor (Figure S1) consisting in a glass jacketed reservoir, a recirculation peristaltic pump and a tubular Pyrex® glass photoreactor with annular section, equipped with a 15 W actinic lamp (Phillips TL-D,  $\lambda_{\max}$  = 366 nm). In each experiment, 500 mL of TiO<sub>2</sub> suspension at pH 2.8 (adjusted with HClO<sub>4</sub>), with the desired concentrations of KNO<sub>3</sub> ( $[\text{NO}_3^-]_0 = 80\text{-}8000 \mu\text{M}$ ) and HCOOH ( $[\text{HCOOH}]_0 = 100\text{-}1000 \mu\text{M}$ ), was added into the reactor, recirculated during 30 min in the dark to reach the adsorption equilibrium on the catalyst surface, and then irradiated for at least 60 min. Adsorption of nitrate and formic acid on the photocatalyst was negligible, as found previously by Wehbe et al.<sup>1</sup> All the experiments were made at  $25.0 \pm 0.1$  °C and under continuous N<sub>2</sub> bubbling at 600 mL min<sup>-1</sup>.

Samples were periodically withdrawn, filtered through 0.22 μm cellulose acetate filters and conditioned to determine [NO<sub>3</sub><sup>-</sup>], [NO<sub>2</sub><sup>-</sup>], [NH<sub>4</sub><sup>+</sup>] and [HCOOH]. The concentrations of NO<sub>3</sub><sup>-</sup>, NO<sub>2</sub><sup>-</sup> and NH<sub>4</sub><sup>+</sup> were measured spectrophotometrically using the standard methods SM-4500-NO<sub>3</sub>-E,<sup>2</sup> SM-4500-NO<sub>2</sub>-B<sup>3</sup> and SM-4500-NH<sub>3</sub>-F,<sup>4</sup> respectively, employing a HP8453A spectrophotometer (Hewlett-Packard) with UV detection. HCOOH concentration was determined using a Shimadzu 5000 A TOC analyzer in the non-purgeable organic carbon (NPOC) mode.

NO<sub>x</sub> concentration during the photocatalytic runs was monitored using a Horiba PG-250 gas phase analyzer based on the chemiluminescent reaction between NO and O<sub>3</sub>.<sup>5</sup>

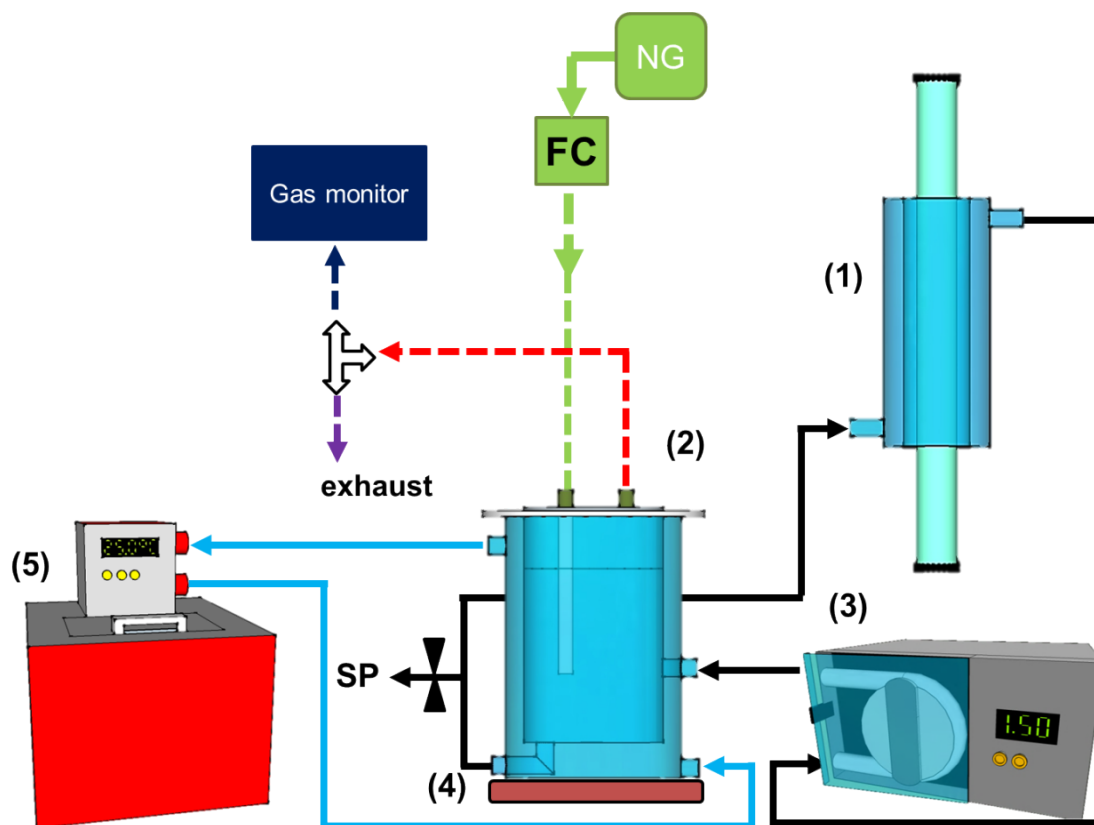

**Figure S1.** Recirculating batch reactor: (1) Pyrex® tubular photoreactor, (2) glass jacketed reservoir, (3) peristaltic pump, (4) magnetic stirrer, (5) thermocirculator. FC is the flow controller, NG the nitrogen generator and SP is the liquid sampling port used to collect samples during the photocatalytic runs.

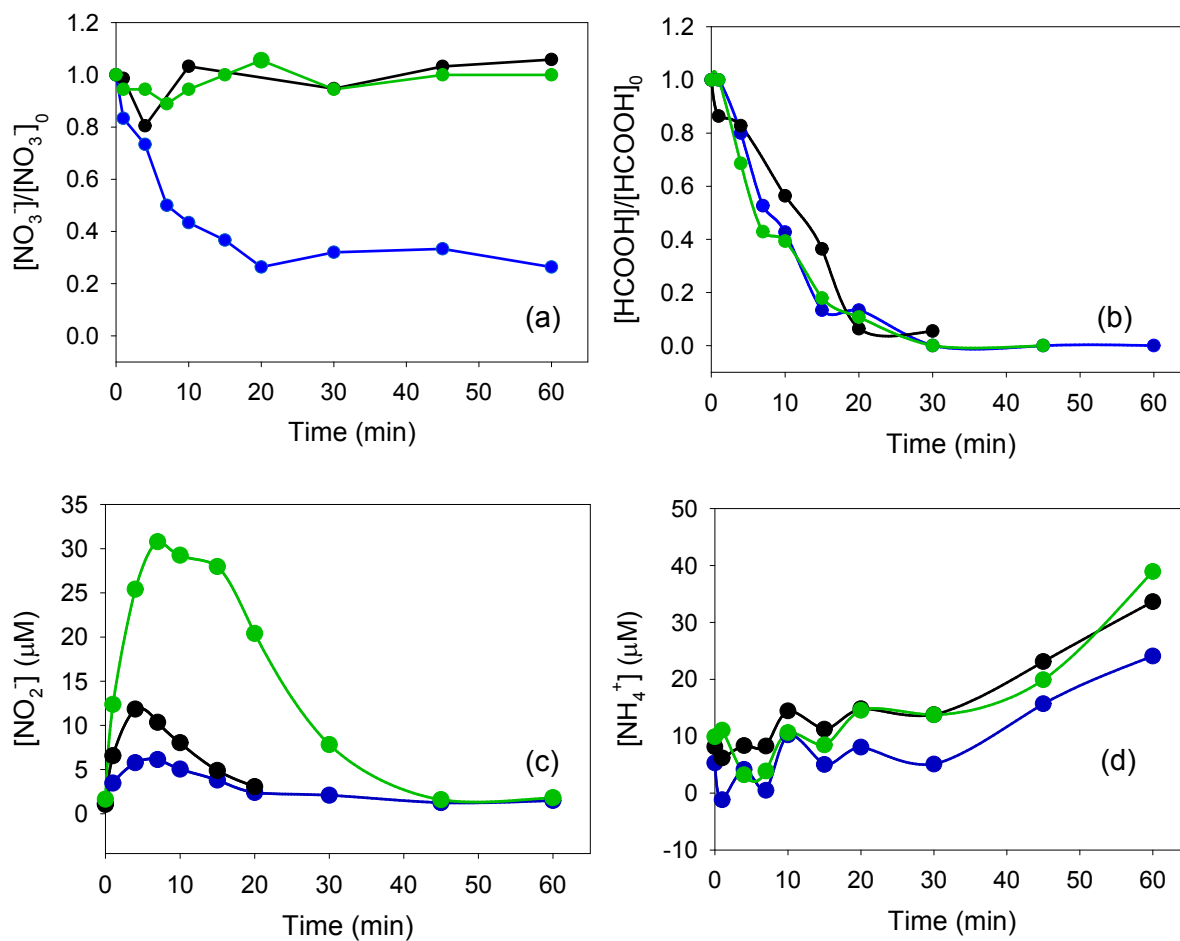

**Figure S2.** Time evolution for (a)  $[\text{NO}_3^-]/[\text{NO}_3^-]_0$ , (b)  $[\text{HCOOH}]/[\text{HCOOH}]_0$ , (c)  $[\text{NO}_2^-]$  and (d)  $[\text{NH}_4^+]$  during the treatment of  $\text{NO}_3^-$  by HP in aqueous phase with  $\text{TiO}_2$  in the presence of  $[\text{HCOOH}] = 0.1 \text{ mM}$  and  $[\text{NO}_3^-]_0 = 0.08 \text{ mM}$  (blue),  $0.8 \text{ mM}$  (black) and  $8 \text{ mM}$  (green).

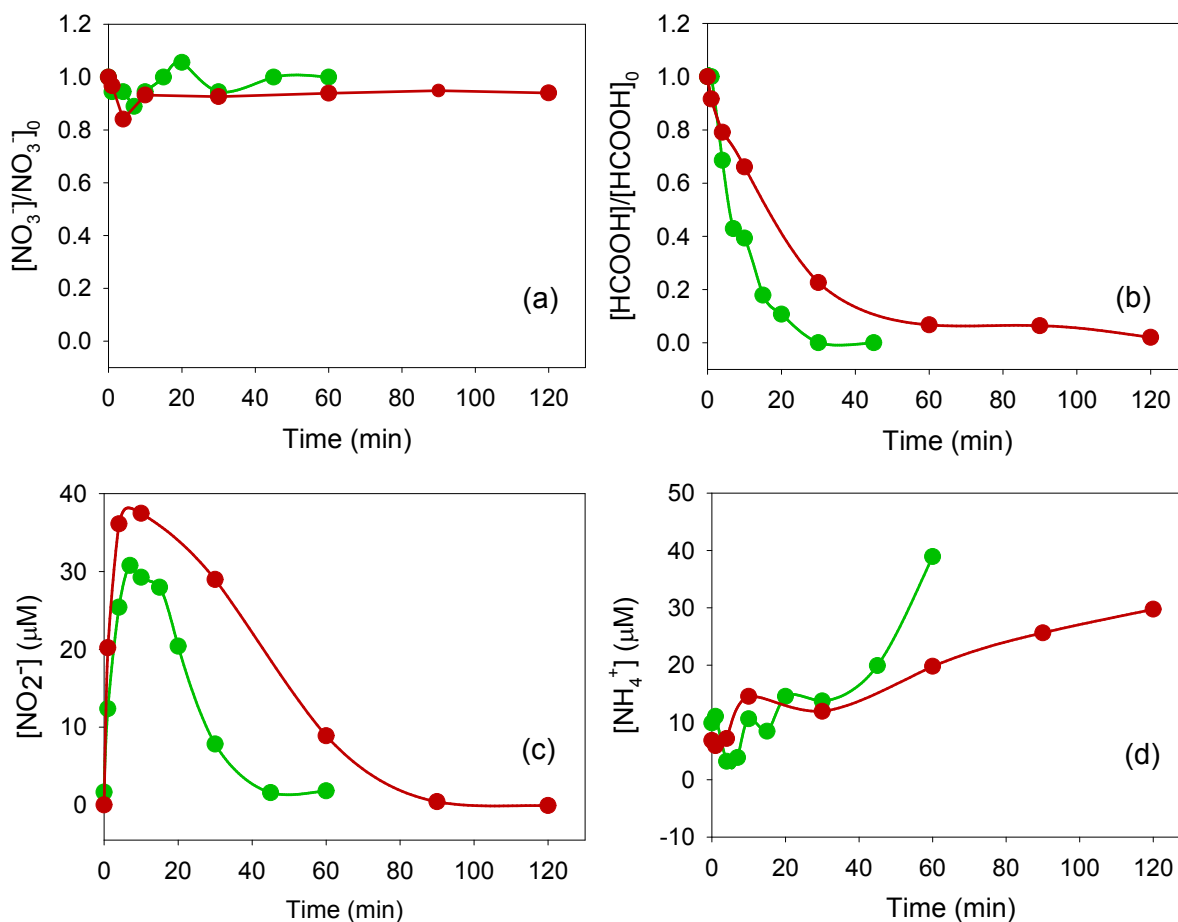

**Figure S3.** Time evolution for (a)  $[\text{NO}_3^-]/[\text{NO}_3^-]_0$ , (b)  $[\text{HCOOH}]/[\text{HCOOH}]_0$ , (c)  $[\text{NO}_2^-]$  and (d)  $[\text{NH}_4^+]$  during the treatment of  $\text{NO}_3^-$  by HP in aqueous phase with  $\text{TiO}_2$  in the presence of  $[\text{HCOOH}]_0 = 0.1$  (green) and 1 mM (red) and  $[\text{NO}_3^-]_0 = 8$  mM.

## REFERENCES

- 1 N. Wehbe, M. Jaafar, C. Guillard, J.-M. Herrmann, S. Miachon, E. Puzenat and N. Guilhaume, *Appl. Catal. A Gen.*, 2009, **368**, 1.
- 2 APHA. In *Standard Methods for the Examination of Water and Wastewater*; 2000; pp. 120–129.
- 3 APHA. In *Standard Methods for the Examination of Water and Wastewater*; 2000.
- 4 APHA. In *Standard Methods for the Examination of Water and Wastewater*; 1997.
- 5 E. J. Dunlea, S. C. Herndon, D. D. Nelson, R. M. Volkamer, F. San Martini, P. M. Sheehy, M. S. Zahniser, J. H. Shorter, J. C. Wormhoudt, B. K. Lamb, E. J. Allwine, J. S. Gaffney, N. A. Marley, M. Grutter, C. Marquez, S. Blanco, B. Cardenas, A. Retama, C. R. Ramos Villegas, C. E. Kolb, L. T. Molina and M. Molina, *J. Atmos. Chem. Phys. Discuss.*, 2007, **7**, 569.
